# Supplementary material for: Carbonate-based hyper-cross-linked polymers with pendant versatile electron-withdrawing functional groups for CO2adsorption and separation
Source: Royal Society of Chemistry journal article supplement (doi:10.1039/d2ta02774g), 2022-01-01
Supplement: d2ta02774g1.pdf [file d2ta02774g1.pdf]

## **Carbonates based hyper-cross-linked polymers with pendant versatile electron-withdrawing functional groups for CO<sub>2</sub> adsorption and separation**

Shuangshuang Hou,<sup>a</sup> Jiarui Hu,<sup>a</sup> Xueting Liang,<sup>a</sup> Daohong Zhang <sup>a\*</sup> and Bien Tan <sup>b\*</sup>

<sup>a</sup> Key Laboratory of Catalysis and Energy Materials Chemistry of Ministry of Education & Hubei Key Laboratory of Catalysis and Materials Science, Hubei R&D Center of Hyperbranched Polymers Synthesis and Applications, School of Chemistry and Materials Science, South-Central Minzu University, Wuhan 430074, Hubei Province, China

<sup>b</sup> Key Laboratory of Material Chemistry for Energy Conversion and Storage, Ministry of Education, Hubei Key Laboratory of Material Chemistry and Service Failure, School of Chemistry and Chemical Engineering, Huazhong University of Science and Technology, Wuhan 430074, Hubei Province, China

\* To whom the correspondence should be addressed.

E-mail: daohong.zhang@scuec.edu.cn

E-mail: bien.tan@mail.hust.edu.cn Tel: +86-27-87558172 Fax: +86-27-87543632

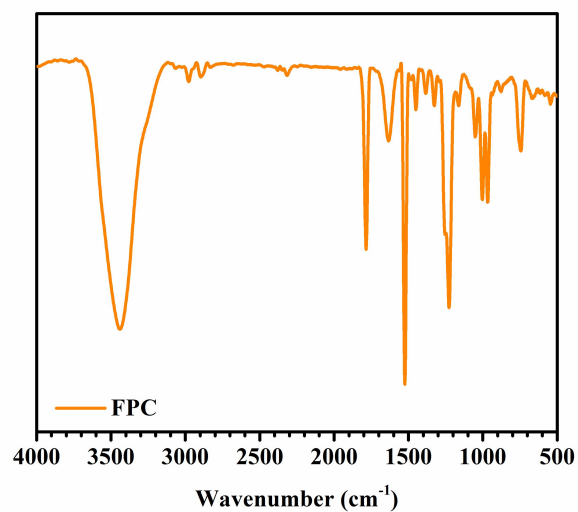

**Figure S1.** Fourier transform infrared spectrum of FPC.

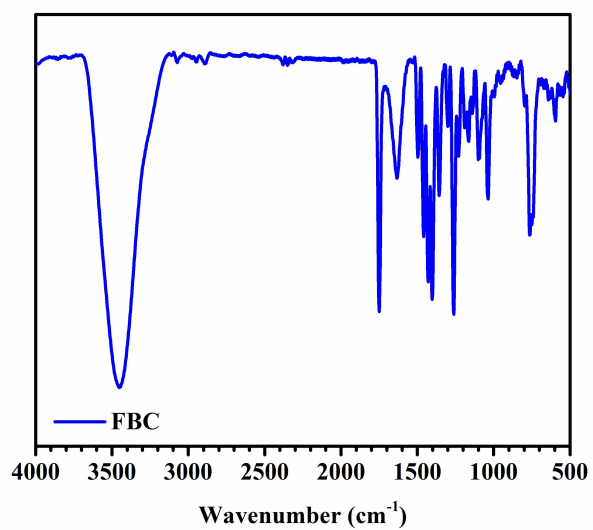

**Figure S2.** Fourier transform infrared spectrum of FBC.

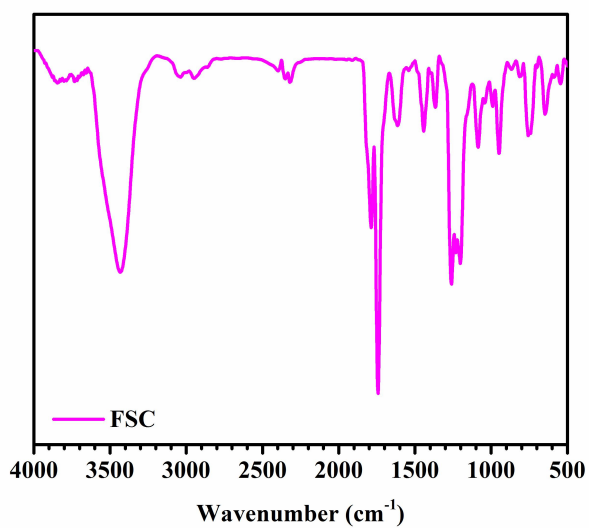

**Figure S3.** Fourier transform infrared spectrum of FSC.

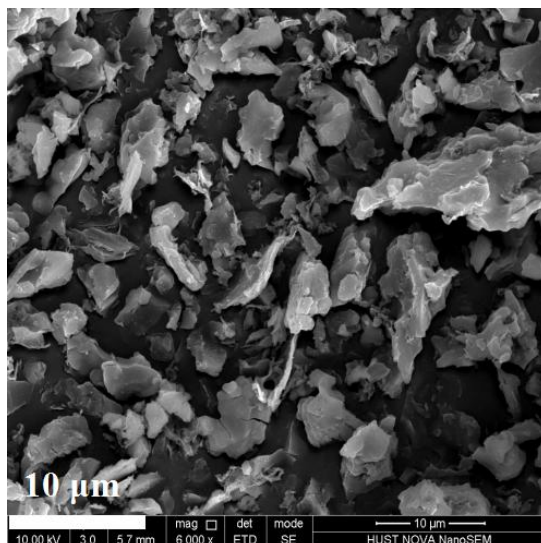

**Figure S4.** SEM of FPC-based polymer **1** at a scale bar of 10  $\mu\text{m}$ .

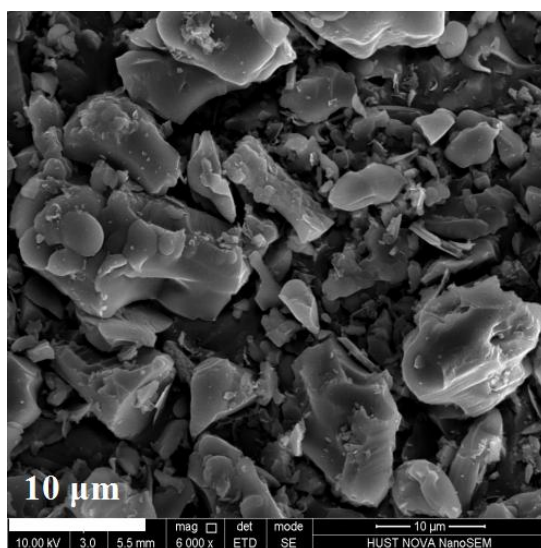

**Figure S5.** SEM of FBC-based polymer **2** at a scale bar of 10  $\mu\text{m}$ .

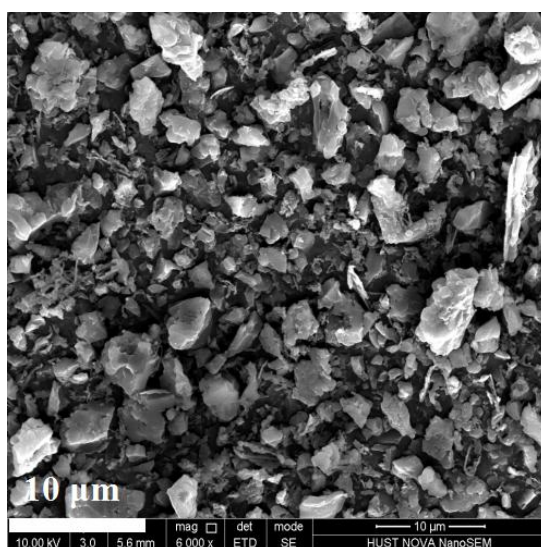

**Figure S6.** SEM of FSC-based polymer **3** at a scale bar of 10  $\mu\text{m}$ .

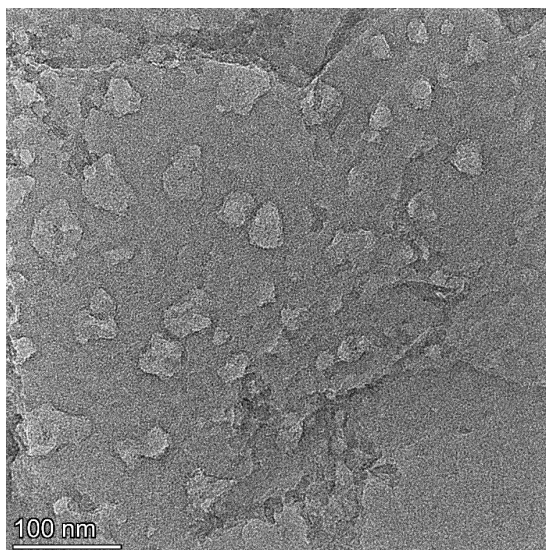

**Figure S7.** TEM of FPC-based polymer **1** at a scale bar of 100 nm.

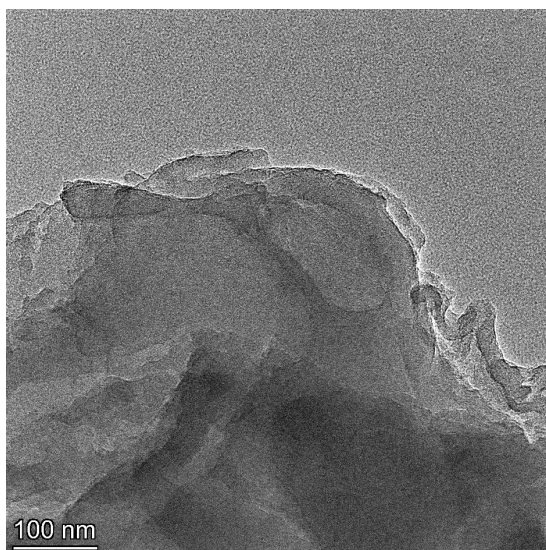

**Figure S8.** TEM of FBC-based polymer **2** at a scale bar of 100 nm.

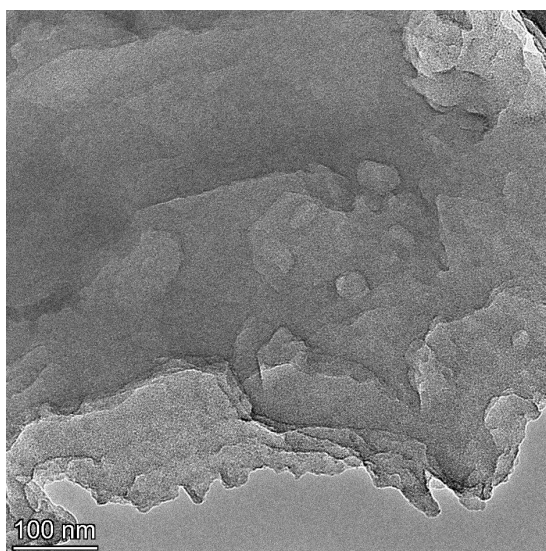

**Figure S9.** TEM of FSC-based polymer **3** at a scale bar of 100 nm.

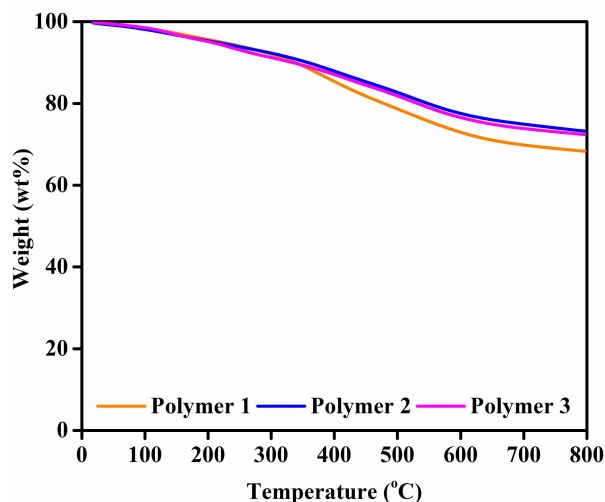

**Figure S10.** TGA analysis of FPC-based polymer 1, FBC-based polymer 2 and FSC-based polymer 3.

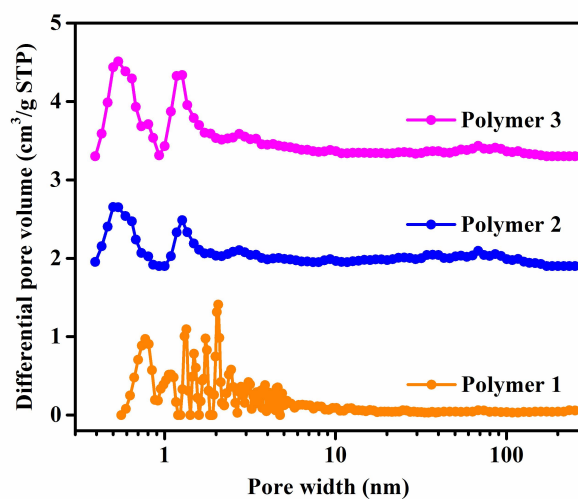

**Figure S11.** Pore distribution of pore size distribution calculated using NLDFT methods (slit pore models, differential pore volumes) of generated porous organic polymers.

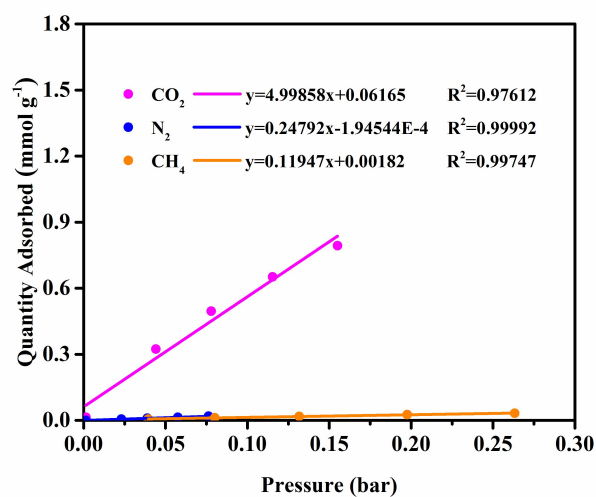

**Figure S12.** Adsorption selectivity of CO<sub>2</sub>/N<sub>2</sub> and CO<sub>2</sub>/CH<sub>4</sub> for polymer 1 calculated using Henry's law initial slope method according to their adsorption isotherms of CO<sub>2</sub> (pink), N<sub>2</sub> (blue) and CH<sub>4</sub> (orange) at 273.15 K.

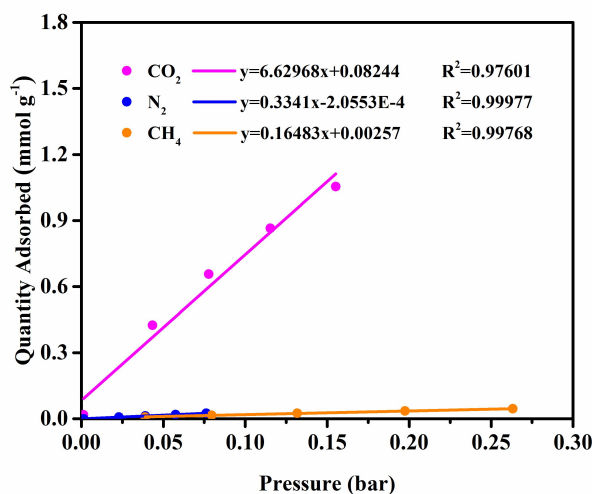

**Figure S13.** Adsorption selectivity of CO<sub>2</sub>/N<sub>2</sub> and CO<sub>2</sub>/CH<sub>4</sub> for polymer **2** calculated using Henry's law initial slope method according to their adsorption isotherms of CO<sub>2</sub> (pink), N<sub>2</sub> (blue) and CH<sub>4</sub> (orange) at 273.15 K.

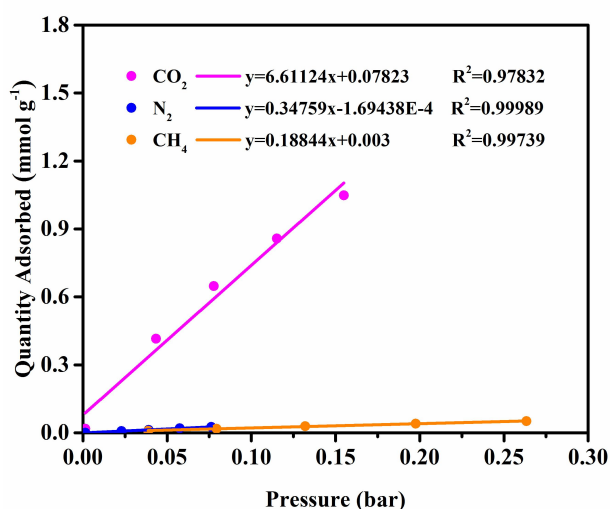

**Figure S14.** Adsorption selectivity of CO<sub>2</sub>/N<sub>2</sub> and CO<sub>2</sub>/CH<sub>4</sub> for polymer **3** calculated using Henry's law initial slope method according to their adsorption isotherms of CO<sub>2</sub> (pink), N<sub>2</sub> (blue) and CH<sub>4</sub> (orange) at 273.15 K.

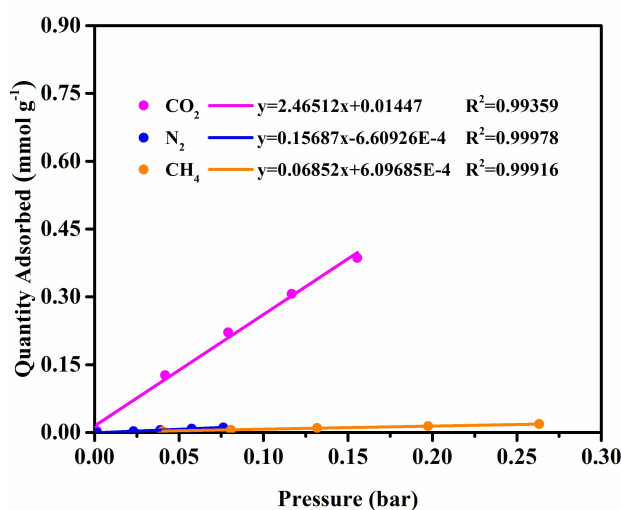

**Figure S15.** Adsorption selectivity of CO<sub>2</sub>/N<sub>2</sub> and CO<sub>2</sub>/CH<sub>4</sub> for polymer **1** calculated using Henry's law initial slope method according to their adsorption isotherms of CO<sub>2</sub> (pink), N<sub>2</sub> (blue) and CH<sub>4</sub> (orange) at 298.15 K.

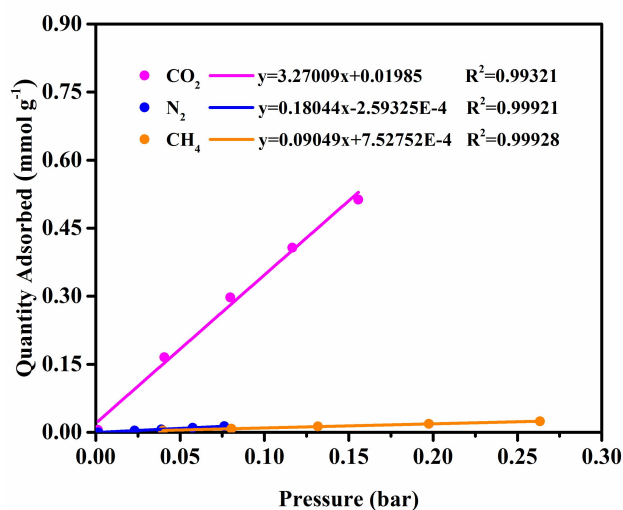

**Figure S16.** Adsorption selectivity of CO<sub>2</sub>/N<sub>2</sub> and CO<sub>2</sub>/CH<sub>4</sub> for polymer **2** calculated using Henry's law initial slope method according to their adsorption isotherms of CO<sub>2</sub> (pink), N<sub>2</sub> (blue) and CH<sub>4</sub> (orange) at 298.15 K.

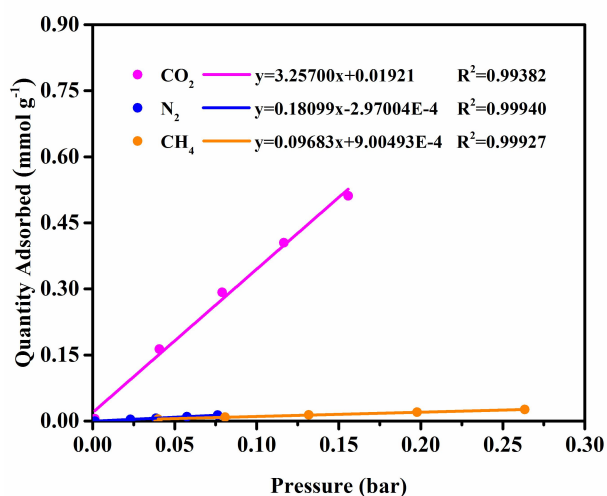

**Figure S17.** Adsorption selectivity of CO<sub>2</sub>/N<sub>2</sub> and CO<sub>2</sub>/CH<sub>4</sub> for polymer **3** calculated using Henry's law initial slope method according to their adsorption isotherms of CO<sub>2</sub> (pink), N<sub>2</sub> (blue) and CH<sub>4</sub> (orange) at 298.15 K.

**Table S1.** The content of different elements for porous hyper-cross-linked polymers based on the elemental analysis and parent building blocks by theoretical calculation according to Equation S2.

| Samples          | C (%) | H (%) | O (%) | N (%) | F (%) |
|------------------|-------|-------|-------|-------|-------|
| FPC              | 62.07 | 2.71  | 11.82 | 0.00  | 23.40 |
| polymer <b>1</b> | 60.11 | 2.34  | 9.28  | 0.00  | 20.77 |
| FBC              | 70.59 | 4.20  | 13.45 | 11.76 | 0.00  |
| polymer <b>2</b> | 68.43 | 3.88  | 11.64 | 10.25 | 0.00  |
| FSC              | 67.66 | 4.45  | 23.74 | 4.15  | 0.00  |
| polymer <b>3</b> | 65.81 | 4.04  | 21.46 | 3.89  | 0.00  |

$$\text{Yield \%} = \frac{m_1 \text{ (g)}}{m_2 \text{ (g)}} \times 100\% \quad (1)$$

Where  $m_1$  is the weight of polymer 1, polymer 2 and polymer 3 measured respectively after drying in a vacuum oven at 70 °C for 48 h,  $m_2$  is the weight of FPC, FBC and FSC correspondingly.

**Equation S1** The yield estimation of polymer 1, polymer 2 and polymer 3.

$$N \% = \frac{n \times Ar \text{ (N)}}{Mr \text{ (M)}} \times 100\% \quad (2)$$

Where  $Mr \text{ (M)}$  is the relative molecular mass of a monomer molecule,  $n$  is the number of one element atom in a monomer molecule,  $Ar \text{ (N)}$  is the relative atom mass of corresponding element atom.

**Equation S2** The element content estimation of a monomer molecule.
